# Supplementary material
Source: PubMed Central journal article supplement (PMC6310621)
Supplement: NIHMS1512048-supplement-1.pdf [file NIHMS1512048-supplement-1.pdf]

**Appendix.**

1- Waist-pull magnitude definitions:

| Waist-Pull Magnitudes | Displacement (cm) | Velocity (cm.s <sup>-1</sup> ) | Initial Acceleration (cm.s <sup>-2</sup> ) |
|-----------------------|-------------------|--------------------------------|--------------------------------------------|
| 1                     | 6.8               | 18.0                           | 900                                        |
| 2                     | 9.0               | 27.0                           | 900                                        |
| 3                     | 11.3              | 36.0                           | 900                                        |
| 4                     | 13.5              | 45.0                           | 900                                        |
| 5                     | 15.8              | 54.0                           | 900                                        |

2- The two-dimensional inverse dynamics equations of motion from Zatsiorsky (2002):

$$1) \quad F_i - F_{i+1} + m_i g = m_i a_i$$

Where  $F_i$  and  $F_{i+1}$  are the forces acting on the distal and proximal joints of the  $i$ th body segment,  $m_i$  is the mass of the segment,  $g$  is the acceleration of gravity, and  $a_i$  is the linear acceleration of the segment center of mass.

$$2) \quad M_i - M_{i+1} + (r_i \times F_i) - (r_{i+1} \times F_{i+1}) = I_i \alpha_i$$

Where  $M_i$  and  $M_{i+1}$  are the moments acting on the distal and proximal joints of the  $i$ th body segment, respectively,  $r_i$  and  $r_{i+1}$  are the radii from the segment center of mass to joint centers  $i$  and  $i+1$ , respectively,  $I_i$  is the moment of inertia relative to the segment center of mass, and  $\alpha_i$  is the angular acceleration relative to the segment center of mass.

3- Estimated net joint power equation (Enoka, 2002; Winter, 1992):

$$Net\ joint\ power = Net\ joint\ Torque \cdot \omega$$

$\omega$ - joint angular velocity.
